# Supplementary material for: Facility-Level Variation in Dialysis Use and Mortality Among Older Veterans With Incident Kidney Failure
Source: PubMed Central journal article supplement (PMC7811178; doi:10.1001/jamanetworkopen.2020.34084), 2021-01-15

## Supplementary Online Content

Bradshaw C, Thomas IC, Montez-Rath ME, et al. Facility-level variation in dialysis use and mortality among older veterans with incident kidney failure. *JAMA Netw Open*. 2021;4(1):e2034084. doi:10.1001/jamanetworkopen.2020.34084

**eFigure.** Flow Diagram of Analytic Cohort

This supplementary material has been provided by the authors to give readers additional information about their work.

**eFigure.** Flow Diagram of Analytic Cohort

Abbreviations: eGFR – estimated glomerular filtration rate

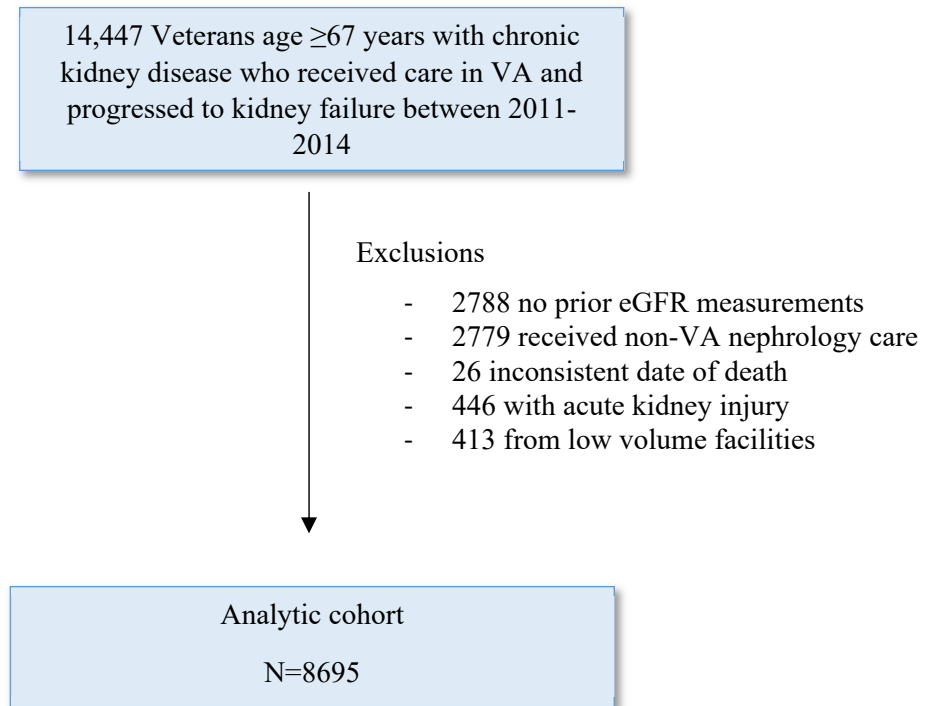

Supplement: jamanetwopen-e2034084-s001.pdf [file jamanetwopen-e2034084-s001.pdf]
